# Supplementary material
Source: PubMed Central journal article supplement (PMC7939720)

## Supplementary materials for:

Albarqouni L, Sanders S, Clark J, Tikkinen KA, Glasziou P. Self-management for men with lower urinary tract symptoms: a systematic review and meta-analysis. *Ann Fam Med*. 2021;19(2):157-167.

## Supplemental Appendix. Search strategy used in this systematic review

### PubMed search run 10/07/2019

```
("Lower Urinary Tract Symptoms"[Mesh] OR "Prostatic Hyperplasia"[Mesh] OR "Urinary tract symptoms"[tiab] OR LUTS[tiab] OR Dysuria[tiab] OR Nocturia[tiab] OR Prostatism[tiab] OR "Overactive bladder"[tiab] OR "Underactive bladder"[tiab] OR "Urinary Incontinence"[tiab] OR "Urinary Stress"[tiab] OR "Urinary Urge"[tiab] OR "Painful Urination"[tiab] OR "Frequent Urination"[tiab] OR Nycturia[tiab] OR "Urge Incontinence"[tiab] OR "Prostatic Hypertrophy"[tiab] OR "Prostatic Hyperplasia"[tiab] OR "Prostatic Adenomas"[tiab] OR "Prostatic Adenoma"[tiab])
AND
(
"Self Care"[Mesh] OR "Behavior Therapy"[Mesh] OR "Life Style"[Mesh] OR "Self care"[tiab] OR "Self management"[tiab] OR Self-management[tiab] OR SMP[tiab] OR Behavioral[tiab] OR Behavioural[tiab] OR "Education"[tiab] OR "Fluid management"[tiab] OR "Bladder retraining"[tiab] OR "Bladder re-training"[tiab] OR "Toileting"[tiab] OR "Toilet training"[tiab] OR "Fluid input"[tiab] OR "Fluid manipulation"[tiab] OR Lifestyle[ti] OR "Life style"[ti] OR Lifestyles[ti] OR "Life styles"[ti] OR ((Avoid[tiab] OR Avoiding[tiab]) AND (Constipation[tiab])) OR (("Fluid intake"[tiab]) AND (Increase[tiab] OR Increasing[tiab] OR Decrease[tiab] OR Decreasing[tiab] OR Modify[tiab] OR Modifying[tiab])) OR (("Pelvic floor"[tiab]) AND (training[tiab] OR exercise[tiab] OR exercises[tiab]))
)
AND
(Randomized controlled trial[pt] OR controlled clinical trial[pt] OR randomized[tiab] OR randomised[tiab] OR placebo[tiab] OR "drug therapy"[sh] OR randomly[tiab] OR trial[tiab] OR groups[tiab])
NOT
(Animals[Mesh] not (Animals[Mesh] and Humans[Mesh]))
NOT
(Female[Mesh] not (female[Mesh] and male[Mesh]))
```

### Cochrane CENTRAL 10/07/2019

```
([mh "Lower Urinary Tract Symptoms"] OR [mh "Prostatic Hyperplasia"] OR "Urinary tract symptoms":ti,ab OR LUTS:ti,ab OR Dysuria:ti,ab OR Nocturia:ti,ab OR Prostatism:ti,ab OR "Overactive bladder":ti,ab OR "Underactive bladder":ti,ab OR "Urinary Incontinence":ti,ab OR "Urinary Stress":ti,ab OR "Urinary Urge":ti,ab OR "Painful Urination":ti,ab OR "Frequent Urination":ti,ab OR Nycturia:ti,ab OR "Urge Incontinence":ti,ab OR "Prostatic Hypertrophy":ti,ab OR "Prostatic Hyperplasia":ti,ab OR "Prostatic Adenomas":ti,ab OR "Prostatic Adenoma":ti,ab)
AND
(
[mh "Self Care"] OR [mh "Behavior Therapy"] OR [mh "Life Style"] OR "Self care":ti,ab OR "Self management":ti,ab OR Self-management:ti,ab OR SMP:ti,ab OR Behavioral:ti,ab OR Behavioural:ti,ab OR Education:ti,ab OR "Fluid management":ti,ab OR "Bladder retraining":ti,ab OR "Bladder re-training":ti,ab OR Toileting:ti,ab OR "Toilet training":ti,ab OR "Fluid input":ti,ab OR "Fluid
```

manipulation":ti,ab OR Lifestyle:ti OR "Life style":ti OR Lifestyles:ti OR "Life styles":ti OR ((Avoid:ti,ab OR Avoiding:ti,ab) AND (Constipation:ti,ab)) OR (("Fluid intake":ti,ab) AND (Increase:ti,ab OR Increasing:ti,ab OR Decrease:ti,ab OR Decreasing:ti,ab OR Modify:ti,ab OR Modifying:ti,ab)) OR (("Pelvic floor":ti,ab) AND (training:ti,ab OR exercise:ti,ab OR exercises:ti,ab))  
)  
NOT  
([mh Female] NOT ([mh female] AND [mh male]))

### Embase 10/07/2019

('Lower Urinary Tract Symptom'/exp/mj OR 'prostate hypertrophy'/exp/mj OR "Urinary tract symptoms":ti,ab OR LUTS:ti,ab OR Dysuria:ti,ab OR Nocturia:ti,ab OR Prostatism:ti,ab OR "Overactive bladder":ti,ab OR "Underactive bladder":ti,ab OR "Urinary Incontinence":ti,ab OR "Urinary Stress":ti,ab OR "Urinary Urge":ti,ab OR "Painful Urination":ti,ab OR "Frequent Urination":ti,ab OR Nycturia:ti,ab OR "Urge Incontinence":ti,ab OR "Prostatic Hypertrophy":ti,ab OR "Prostatic Hyperplasia":ti,ab OR "Prostatic Adenomas":ti,ab OR "Prostatic Adenoma":ti,ab)  
AND  
(  
'Self Care'/exp/mj OR 'Behavior Therapy'/exp/mj OR 'Lifestyle'/exp/mj OR "Self care":ti,ab OR "Self management":ti,ab OR Self-management:ti,ab OR SMP:ti,ab OR Behavioral:ti,ab OR Behavioural:ti,ab OR Education:ti,ab OR "Fluid management":ti,ab OR "Bladder retraining":ti,ab OR "Bladder re-training":ti,ab OR Toileting:ti,ab OR "Toilet training":ti,ab OR "Fluid input":ti,ab OR "Fluid manipulation":ti,ab OR Lifestyle:ti OR "Life style":ti OR Lifestyles:ti OR "Life styles":ti OR ((Avoid:ti,ab OR Avoiding:ti,ab) AND (Constipation:ti,ab)) OR (("Fluid intake":ti,ab) AND (Increase:ti,ab OR Increasing:ti,ab OR Decrease:ti,ab OR Decreasing:ti,ab OR Modify:ti,ab OR Modifying:ti,ab)) OR (("Pelvic floor":ti,ab) AND (training:ti,ab OR exercise:ti,ab OR exercises:ti,ab))  
)  
AND  
(random\* OR factorial OR crossover OR placebo OR blind OR blinded OR assign OR assigned OR allocate OR allocated OR 'crossover procedure'/exp OR 'double-blind procedure'/exp OR 'randomized controlled trial'/exp OR 'single-blind procedure'/exp NOT ('animal'/exp NOT ('animal'/exp AND 'human'/exp)))  
NOT  
( 'Female'/exp NOT ('female'/exp AND 'male'/exp))  
AND  
[embase]/lim

## Supplemental Tables

**Supplemental Table 1.** Details of the 13 studies (18 articles) that are included in the review but did not provide usable outcome data\*.

| Author Year | Title; Journal                                                                                                                                                                                                                                          | Reason                                         | Comparison          |
|-------------|---------------------------------------------------------------------------------------------------------------------------------------------------------------------------------------------------------------------------------------------------------|------------------------------------------------|---------------------|
| 1           | Bryant 2002<br>Caffeine reduction education to improve urinary symptoms; <i>Br J Nurs</i>                                                                                                                                                               | No subgroup analysis for men                   | Single component    |
| 2           | Chancellor 2008<br>A comparison of the efficacy of darifenacin alone vs. darifenacin plus a Behavioural Modification Programme upon the symptoms of overactive bladder; <i>Int J Clin Pract</i>                                                         | No subgroup analysis for men                   | SM + drug vs. drug  |
| 3           | Chen 2008<br>Does pelvic floor muscle exercises adding on effects on overactive bladder patients with unsatisfactory drug responses? (Abstract number 183); <i>Proceedings of the 38th annual meeting of the international continence society (ICS)</i> | Abstract only and no subgroup analysis for men | SM + drug vs. drug  |
| 4           | Cho 2014<br>Effect of combined systematized behavioral modification education program with desmopressin in patients with nocturia: a prospective, multicenter, randomized, and parallel study; <i>Int Neurourol J</i>                                   | No subgroup analysis for men                   | SM + drug vs drug   |
|             | Cho 2015<br>The effect of combined systematized behavioral modification education program (SBMP) with DDAVP in patients with nocturia: a multicenter, randomized, and parallel study; <i>European Urology, Supplements</i> .                            |                                                |                     |
|             | Cho 2015<br>The effect of combined systematized behavioral modification education program (SBMP) with DDAVP in patients with nocturia: A prospective, multicenter, randomized, and parallel study; <i>Journal of Urology</i>                            |                                                |                     |
| 5           | Duong 2019<br>Community pharmacist intervention for lower urinary tract symptoms: a pilot study; <i>J Am Geriatr Soc</i>                                                                                                                                | Abstract only and no subgroup analysis for men | SM vs control/usual |
|             | Sadowski 2017<br>Feasibility of a community pharmacist intervention for lower urinary tract symptoms; <i>Canadian Pharmacists Journal</i>                                                                                                               |                                                |                     |
| 6           | Herschorn 2004<br>Impact of a health education intervention in overactive bladder patients; <i>Can J Urol</i>                                                                                                                                           | No subgroup analysis for men                   | SM + drug vs. drug  |
|             | Herschorn 2003<br>The impact of a simple health education intervention in overactive bladder patients (Abstract); <i>Proceedings of the 33rd annual meeting of the international continence society (ICS)</i>                                           |                                                | SM + drug vs. drug  |

|    |                 |                                                                                                                                                                                                                                                                                                                                                                          |                                                |                     |
|----|-----------------|--------------------------------------------------------------------------------------------------------------------------------------------------------------------------------------------------------------------------------------------------------------------------------------------------------------------------------------------------------------------------|------------------------------------------------|---------------------|
| 7  | Kilinc 2019     | Using a checklist to increase the effectiveness of behavioral therapy for overactive bladder: A prospective randomized controlled trial; <i>Neurourol Urodyn</i>                                                                                                                                                                                                         | No subgroup analysis for men                   | SM + drug vs drug   |
| 8  | Kobayashi 2009  | Researches on the improvement of QOL in both patients with overactive bladder syndrome and their caregivers. Comparison between pharmacotherapy alone and combination of pharmacotherapy, physiotherapy, and education of both patients and caregiver (Abstract number 516); <i>Proceedings of the 39th annual meeting of the international continence society (ICS)</i> | Abstract only and no subgroup analysis for men | SM + drug vs drug   |
| 9  | Mattiasson 2003 | Simplified bladder training augments the effectiveness of tolterodine in patients with an overactive bladder; <i>BJU Int</i>                                                                                                                                                                                                                                             | No subgroup analysis for men                   | SM + drug vs drug   |
| 10 | Mattiasson 2010 | Efficacy of simplified bladder training in patients with overactive bladder receiving a solifenacin flexible-dose regimen: results from a randomized study; <i>BJU Int</i>                                                                                                                                                                                               | No subgroup analysis for men                   | SM + drug vs drug   |
|    | Mattiasson 2008 | Solifenacin alone and with simplified bladder re-training in overactive bladder syndrome: the prospective, randomised SOLAR study (Abstract number 179); <i>Proceedings of the 38th annual meeting of the international continence society (ICS)</i>                                                                                                                     |                                                | SM + drug vs drug   |
| 11 | Millard 2004    | Clinical efficacy of tolterodine with or without a simplified pelvic floor exercise regimen; <i>Neurourol Urodyn</i>                                                                                                                                                                                                                                                     | No subgroup analysis for men                   | SM + drug vs drug   |
| 12 | Palmer 2015     | A Feasibility Study for a Posthospital Intervention for Lower Urinary Tract Symptoms in Adults With Heart Failure; <i>J Wound Ostomy Continence Nurs</i>                                                                                                                                                                                                                 | No subgroup analysis for men                   | SM vs control/usual |
| 13 | Weng 2010       | The effects of pelvic floor muscle exercise for irritable symptoms in older men with LUTS suggestive of BPH; <i>International Journal of Urology</i>                                                                                                                                                                                                                     | Abstract only                                  | SM vs control/usual |

Abbreviations: SM: Self-Management. \*The majority of these studies did not report a separate analysis of the effect of interventions for men only.

**Supplemental Table 2.** Details of the 67 articles screened in full text but excluded from the review with reason for their ineligibility

| <b>Author, Year</b>          | <b>Title</b>                                                                                                                                                                          | <b>Journal</b>                                                   | <b>Reason for exclusion</b> |
|------------------------------|---------------------------------------------------------------------------------------------------------------------------------------------------------------------------------------|------------------------------------------------------------------|-----------------------------|
| <b>2003</b>                  | Behavioural training for urge incontinence                                                                                                                                            | Geriatrics & Aging                                               | Study design                |
| <b>2010</b>                  | 34th Congresso Nazionale SIUD, 8th Congresso SIUD - Fisioterapisti Infermieri Ostetriche                                                                                              | Neurourol Urodyn                                                 | No abstract relevant        |
| <b>2011</b>                  | 36th Annual IUGA Meeting                                                                                                                                                              | International Urogynecology Journal and pelvic floor dysfunction | Population not relevant     |
| <b>2012</b>                  | Proceedings of the 11th Annual Meeting of the International Society for the Study of Women's Sexual Health, ISSWSH 2012                                                               | Journal of Sexual Medicine                                       | Population not relevant     |
| <b>2013</b>                  | 43rd Annual Meeting of the International Continence Society, ICS 2013                                                                                                                 | Neurourol Urodyn                                                 | No abstract relevant        |
| <b>2016</b>                  | Abstracts of the Intensive Care Annual Scientific Meeting of the Australian and New Zealand Intensive Care Society, ANZICS and Australian College of Critical Care Nurses, ACCCN 2015 | Anaesthesia and Intensive Care                                   | No abstract relevant        |
| <b>2018</b>                  | 42nd Annual Congress of the Italian Urodynamic Society                                                                                                                                | Neurourol Urodyn                                                 | No abstract relevant        |
| <b>Albertsen 2005</b>        | Single-blind, randomized trial of pelvic floor muscle training, biofeedback-assisted pelvic floor muscle training, and electrical stimulation in the management of overactive bladder | J Urol                                                           | Population not relevant     |
| <b>Azizi 2019</b>            | The effect of a self-care programme on urinary incontinence and self-esteem in elderly men dwelling in nursing homes in Iran.                                                         | The Aging Male                                                   | Population not relevant     |
| <b>Bo 2003</b>               | Pelvic floor muscle strength and response to pelvic floor muscle training for stress urinary incontinence                                                                             | Neurourol Urodyn                                                 | Population not relevant     |
| <b>Bo 2005</b>               | Lower urinary tract symptoms 15 years after ending a randomised controlled trial of pelvic floor muscle training for urodynamic stress incontinence (Abstract number 355)             | European Urology, supplements                                    | Population not relevant     |
| <b>Bonakdar Tehrani 2013</b> | Treating urge incontinence in older adults: A quality adjusted life-year(QALY) bargain                                                                                                | Value in Health                                                  | Study design                |

|                           |                                                                                                                                                                                                                                          |                                                                                                                        |                           |
|---------------------------|------------------------------------------------------------------------------------------------------------------------------------------------------------------------------------------------------------------------------------------|------------------------------------------------------------------------------------------------------------------------|---------------------------|
| <b>Borrie 2002</b>        | Interventions led by nurse continence advisers in the management of urinary incontinence: a randomized controlled trial                                                                                                                  | CMAJ                                                                                                                   | Intervention not relevant |
| <b>Breyer 2014</b>        | Intensive lifestyle intervention reduces urinary incontinence in overweight/obese men with type 2 diabetes: results from the Look AHEAD trial                                                                                            | J Urol                                                                                                                 | Intervention not relevant |
| <b>Burgio 1994</b>        | The effects of changing prompted voiding schedules in the treatment of incontinence in nursing home residents                                                                                                                            | J Am Geriatr Soc                                                                                                       | Study design              |
| <b>Burns 1990</b>         | Treatment of stress incontinence with pelvic floor exercises and biofeedback                                                                                                                                                             | J Am Geriatr Soc                                                                                                       | Population not relevant   |
| <b>Burton 1988</b>        | Behavioral training for urinary incontinence in elderly ambulatory patients                                                                                                                                                              | J Am Geriatr Soc                                                                                                       | Intervention not relevant |
| <b>Carrión Pérez 2015</b> | Telerehabilitation to treat stress urinary incontinence. Pilot study                                                                                                                                                                     | Medicina clinica                                                                                                       | Population not relevant   |
| <b>Celiker Tosun 2013</b> | Are symptoms of urinary incontinence reduced in patients when the muscles of the pelvic floor are strengthened through pelvic floor muscle (PFM) training? What is the relationship between symptoms and strength? (Abstract number 409) | Proceedings of the 43rd annual meeting of the international continence society (ics), 2013 aug 26-30, barcelona, spain | Population not relevant   |
| <b>Celiker Tosun 2013</b> | Determining the effects of pelvic floor exercises in urinary incontinence treatment on pelvic floor muscle strength by non-invasive method, randomized trial (Abstract number 582)                                                       | Proceedings of the 43rd annual meeting of the international continence society (ics), 2013 aug 26-30, barcelona, spain | Population not relevant   |
| <b>Celiker Tosun 2015</b> | Does pelvic floor muscle training abolish symptoms of urinary incontinence? A randomized controlled trial                                                                                                                                | Clinical rehabilitation                                                                                                | Population not relevant   |
| <b>Cho 2008</b>           | A Comparative Study on the Effects on Urinary Incontinence between Pelvic Floor Muscle Exercise and Magnetic Stimulation Therapy                                                                                                         | J Korean Acad Community Health Nurs                                                                                    | Intervention not relevant |
| <b>Choi 2016</b>          | A participatory action research to evaluate the outcomes of care of a nurse-led continence care service for Chinese primary care patients with lower urinary tract symptoms: a two-year prospective longitudinal study                   | Neurourol Urodyn                                                                                                       | Study design              |
| <b>Colling 1992</b>       | The effects of patterned urge-response toileting (PURT) on urinary incontinence among nursing home residents                                                                                                                             | J Am Geriatr Soc                                                                                                       | Intervention not relevant |

|                        |                                                                                                                                                                                                                                                     |                                                                                                                                                                                               |                           |
|------------------------|-----------------------------------------------------------------------------------------------------------------------------------------------------------------------------------------------------------------------------------------------------|-----------------------------------------------------------------------------------------------------------------------------------------------------------------------------------------------|---------------------------|
| <b>Dorey 2004</b>      | Pelvic floor exercises for treating post-micturition dribble in men with erectile dysfunction: a randomized controlled trial                                                                                                                        | Urol Nurs                                                                                                                                                                                     | Intervention not relevant |
| <b>Dumoulin 2004</b>   | Efficacy of deep abdominal training when combined with pelvic floor muscle training for stress urinary incontinence: a single-blind randomized controlled trial (Abstract number 44)                                                                | Progres en urologie                                                                                                                                                                           | Full text not available   |
| <b>Elgohary 2017</b>   | Pulsed electromagnetic field with or without exercise therapy in the treatment of benign prostatic hyperplasia                                                                                                                                      | J Phys Ther Sci                                                                                                                                                                               | Intervention not relevant |
| <b>Eli 2008</b>        | Efficacy and safety of duloxetine compared with placebo, pelvic floor muscle training, and combined duloxetine/pelvic floor muscle training in subjects with moderate to severe stress urinary incontinence. CT Registry ID#2615. Study F1J-MC-SBAF | Eli Lilly clinical trial registry [accessed 4 June 2008]                                                                                                                                      | Population not relevant   |
| <b>Ervin 2018</b>      | Reducing nocturia in community dwelling older people with cardiovascular disease: A prospective study to measure the effects of active leg elevation                                                                                                | Neurourol Urodyn                                                                                                                                                                              | Study design              |
| <b>Fitzgerald 2008</b> | Nocturia, nocturnal incontinence prevalence, and response to anticholinergic and behavioral therapy                                                                                                                                                 | International urogynecology journal and pelvic floor dysfunction                                                                                                                              | Population not relevant   |
| <b>Fonda 1995</b>      | Sustained improvement of subjective quality of life in older community-dwelling people after treatment of urinary incontinence                                                                                                                      | Age and Ageing                                                                                                                                                                                | Comparator not relevant   |
| <b>Griebling 2014</b>  | Re: Efficacy of adding behavioural treatment or antimuscarinic drug therapy to $\alpha$ -blocker therapy in men with nocturia: Editorial comment                                                                                                    | Journal of Urology                                                                                                                                                                            | Study design              |
| <b>Griebling 2014</b>  | Re: internet-based treatment of stress urinary incontinence: a randomised controlled study with focus on pelvic floor muscle training                                                                                                               | Journal of Urology                                                                                                                                                                            | Study design              |
| <b>Hashim 2008</b>     | How should patients with an overactive bladder manipulate their fluid intake?                                                                                                                                                                       | BJU Int                                                                                                                                                                                       | Intervention not relevant |
| <b>Herbison 2004</b>   | Three month results from the URGENT pilot study: a randomised controlled trial comparing drug therapy, bladder retraining and their combination in patients with urge urinary incontinence (Abstract)                                               | Proceedings of the joint meeting of the international continence society (ICS) (34th annual meeting) and the international urogynecological association (IUGA), 2004 Aug 23-27, Paris, France | Population not relevant   |
| <b>Hu 1988</b>         | A clinical trial of a behavioral therapy to reduce urinary incontinence in nursing homes                                                                                                                                                            | Neurourol Urodyn                                                                                                                                                                              | Population not relevant   |

|                      |                                                                                                                                                             |                                            |                                                                                      |
|----------------------|-------------------------------------------------------------------------------------------------------------------------------------------------------------|--------------------------------------------|--------------------------------------------------------------------------------------|
| <b>Hu 1988</b>       | A clinical trial of a behavioural therapy to reduce urinary incontinence in nursing homes (Abstract)                                                        | Neurourol Urodyn                           | Population not relevant                                                              |
| <b>Hu 1990</b>       | Cost effectiveness of training incontinent elderly in nursing homes: a randomized clinical trial                                                            | Health services research                   | Population not relevant                                                              |
| <b>Johnson 2000</b>  | Biofeedback versus verbal instruction for pelvic floor training in the treatment of urinary incontinence                                                    | Journal of women's health physical therapy | Population not relevant                                                              |
| <b>Johnson 2013</b>  | Efficacy of adding behavioural treatment or antimuscarinic drug therapy to alpha-blocker therapy in men with nocturia                                       | BJU Int                                    | Population not relevant/<br>reporting of subgroup analysis of another included study |
| <b>Kafri 2013</b>    | Randomized trial of a comparison of rehabilitation or drug therapy for urgency urinary incontinence: 1-year follow-up                                       | International Urogynecology Journal        | Intervention not relevant                                                            |
| <b>Lee 2014</b>      | Development and evaluation of an E-health system to care for patients with bladder pain syndrome/interstitial cystitis                                      | Int J Urol                                 | Population not relevant                                                              |
| <b>Lee 2018</b>      | Effectiveness and safety of moxibustion for alleviating symptoms of overactive bladder: A prospective, randomized controlled, crossover-design, pilot study | Medicine (Baltimore)                       | Intervention not relevant                                                            |
| <b>Linn 1994</b>     | Geriatrics. Behavioral treatment of urinary incontinence (Abstract)                                                                                         | Rehab: R&D progress reports                | Full text not available                                                              |
| <b>Linn 1996</b>     | Geriatrics: behavioral treatment of urinary incontinence                                                                                                    | Rehab: R&D progress reports                | Intervention not relevant                                                            |
| <b>Markun 2014</b>   | Stress incontinence: first pelvic floor training or direct surgery?                                                                                         | Praxis                                     | Study design                                                                         |
| <b>McDowell 1999</b> | Effectiveness of behavioral therapy to treat incontinence in homebound older adults                                                                         | J Am Geriatr Soc                           | Intervention not relevant                                                            |
| <b>O'Brien 1991</b>  | Urinary incontinence: prevalence, need for treatment, and effectiveness of intervention by nurse                                                            | BMJ                                        | Intervention not relevant                                                            |
| <b>Ponieman 2007</b> | Self management plus usual care was more effective than usual care alone for lower urinary tract symptoms in men: Commentary                                | Evidence-Based Medicine                    | Study design                                                                         |



|                        |                                                                                                                                                                                                                                                                                                                                                                               |                                                                                                                    |                           |
|------------------------|-------------------------------------------------------------------------------------------------------------------------------------------------------------------------------------------------------------------------------------------------------------------------------------------------------------------------------------------------------------------------------|--------------------------------------------------------------------------------------------------------------------|---------------------------|
| <b>Reisenauer 2008</b> | The effectiveness of pelvic floor exercise in patients with stress- urinary incontinence three-armed prospective randomized comparison study (Abstract)                                                                                                                                                                                                                       | Geburtshilfe und frauenheilkunde                                                                                   | Population not relevant   |
| <b>Roehrborn 2015</b>  | Efficacy and safety of a fixed-dose combination of dutasteride and tamsulosin treatment (Duodart((R)) ) compared with watchful waiting with initiation of tamsulosin therapy if symptoms do not improve, both provided with lifestyle advice, in the management of treatment-naive men with moderately symptomatic benign prostatic hyperplasia: 2-year CONDUCT study results | BJU Int                                                                                                            | Intervention not relevant |
| <b>Schnelle 2010</b>   | A controlled trial of an intervention to improve urinary and fecal incontinence and constipation                                                                                                                                                                                                                                                                              | J Am Geriatr Soc                                                                                                   | Intervention not relevant |
| <b>Sung 2015</b>       | Interventions do not enhance medication persistence and compliance in patients with overactive bladder: a 24 weeks, randomised, open-label, multi-center trial                                                                                                                                                                                                                | International journal of clinical practice                                                                         | population not relevant   |
| <b>Szonyi 1995</b>     | Oxybutynin with bladder retraining for detrusor instability in elderly people: a randomized controlled trial                                                                                                                                                                                                                                                                  | Age Ageing                                                                                                         | Intervention not relevant |
| <b>Teo 2008</b>        | Detrusitol (trademark) and multicomponent behavioral training for overactive bladder syndrome: are they synergistic? (Abstract number 191)                                                                                                                                                                                                                                    | Proceedings of the 38th annual meeting of the international continence society (ICS), 2008 oct 20-24, cairo, egypt | Population not relevant   |
| <b>Viereck 2011</b>    | Comparison of solifenacin combined with pelvic floor muscle and whole body vibration training with solifenacin alone in patients with overactive bladder syndrome - a prospective randomized parallel group trial (Trials registry number: nCT01314781)                                                                                                                       | Clinicaltrials.gov ( <a href="http://clinicaltrials.gov">http://clinicaltrials.gov</a> )                           | Population not relevant   |
| <b>White 2002</b>      | Treatment of nocturia with head tilt a randomised control trial                                                                                                                                                                                                                                                                                                               |                                                                                                                    | Full text not available   |
| <b>Williams 2005</b>   | Clinical and cost-effectiveness of a new nurse-led continence service: a randomised controlled trial                                                                                                                                                                                                                                                                          | Br J Gen Pract                                                                                                     | Intervention not relevant |
| <b>Wolters 2006</b>    | Improving initial management of lower urinary tract symptoms in primary care: costs and patient outcomes                                                                                                                                                                                                                                                                      | Scand J Urol Nephrol                                                                                               | Study design              |
| <b>Wong 1997</b>       | Randomized prospective study of the effectiveness of pelvic floor training using biofeedback in the treatment of genuine stress urinary incontinence in Chinese population                                                                                                                                                                                                    | Proceedings of the international continence society (ICS), 27th annual meeting, 1997 sep 23-26, yokohama, japan    | Full text not available   |

|                       |                                                                                                                                                              |                                            |                           |
|-----------------------|--------------------------------------------------------------------------------------------------------------------------------------------------------------|--------------------------------------------|---------------------------|
| <b>Xie 2005</b>       | Effects of psychological interventions on emotion and quality of life of elderly patients with benign prostatic hypertrophy                                  | Chinese journal of clinical rehabilitation | Comparator not relevant   |
| <b>Xu 2018</b>        | Effects of an education program on toileting behaviors and bladder symptoms in overactive bladder patients with type 2 diabetes: A randomized clinical trial | Int J Nurs Stud                            | Intervention not relevant |
| <b>Yoshimura 2014</b> | A multicenter randomized controlled trial of life style measures alone, versus life style measures plus ramelteon, for nocturia: an interim analysis         | Neurourol Urodyn                           | Intervention not relevant |
| <b>Zhang 2016</b>     | From a patient perspective: Is a behavioral intervention to urinary incontinence worthy of trying?                                                           | Psycho-Oncology                            | population not relevant   |
| <b>Zhao 2000</b>      | Microwave combined with pelvic floor muscle exercise treatment for the middle and elderly patients with urinary incontinence                                 | Chinese journal of physical therapy        | Comparator not relevant   |
| <b>Zhu 2006</b>       | A prospective control study on treatment of stress urinary incontinence with alpha-adrenoceptor agonists and pelvic floor muscle exercises                   | Zhonghua fu chan ke za zhi                 | population not relevant   |

## **Supplemental Figures**

**Supplemental Figures 1A, 1B, and 1C**

### A Self-management intervention versus usual care, 24-hour voiding frequency at 12 months

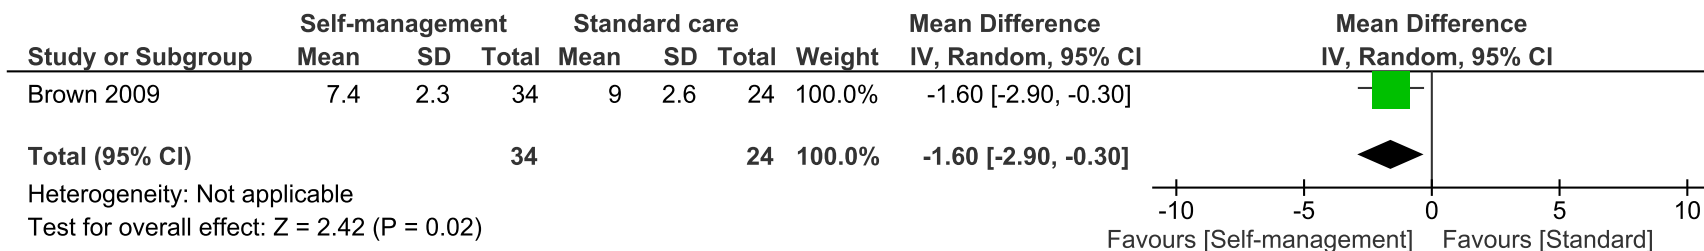

### B Self-management intervention versus drug intervention, 24-hour voiding frequency at 6-12 weeks

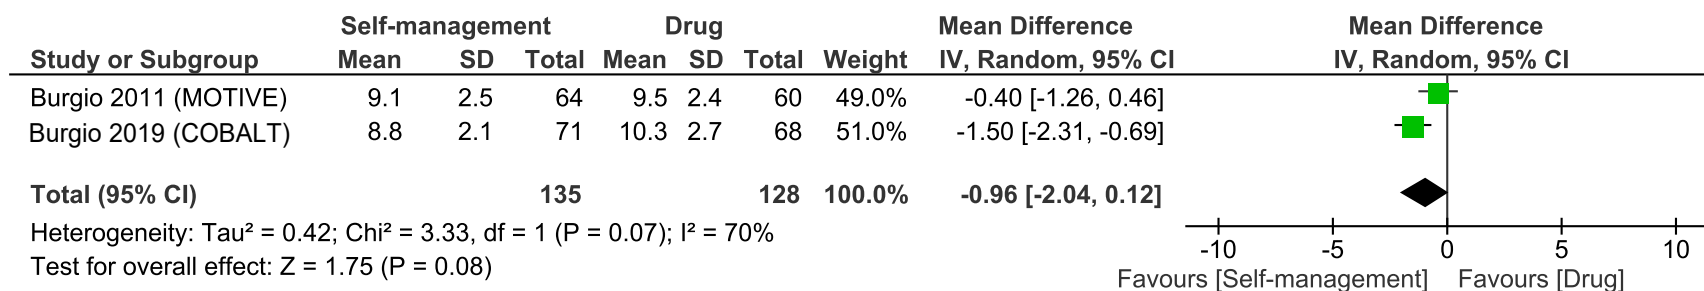

### C Combined self-management intervention and drug interventions versus drug intervention alone, 24-hour voiding frequency at 6 weeks

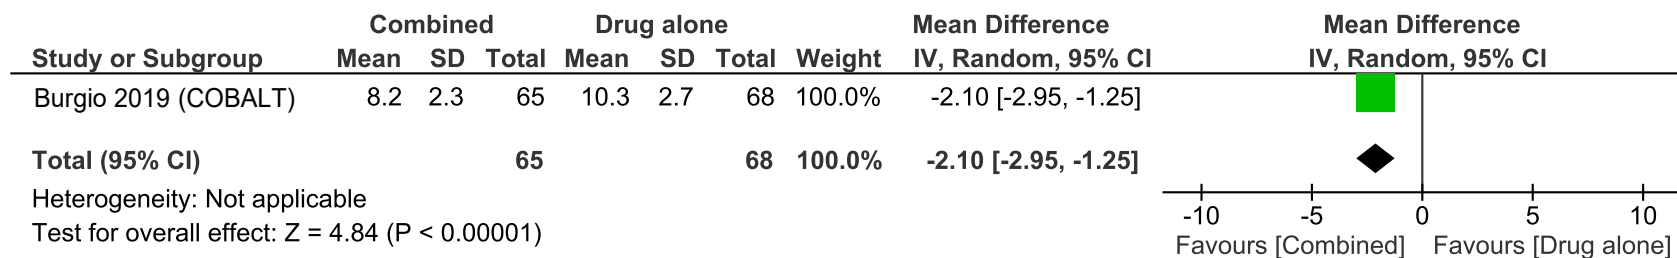

**Supplemental Figures 2A, 2B, and 2C**

### A Self-management intervention versus usual care, nocturia episodes at 12 months

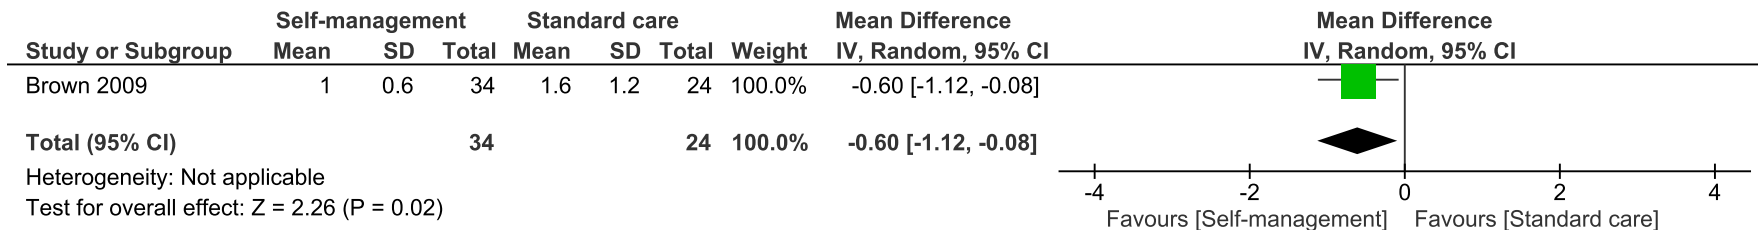

### B Self-management intervention versus drug intervention, nocturia episodes at 6-12 weeks

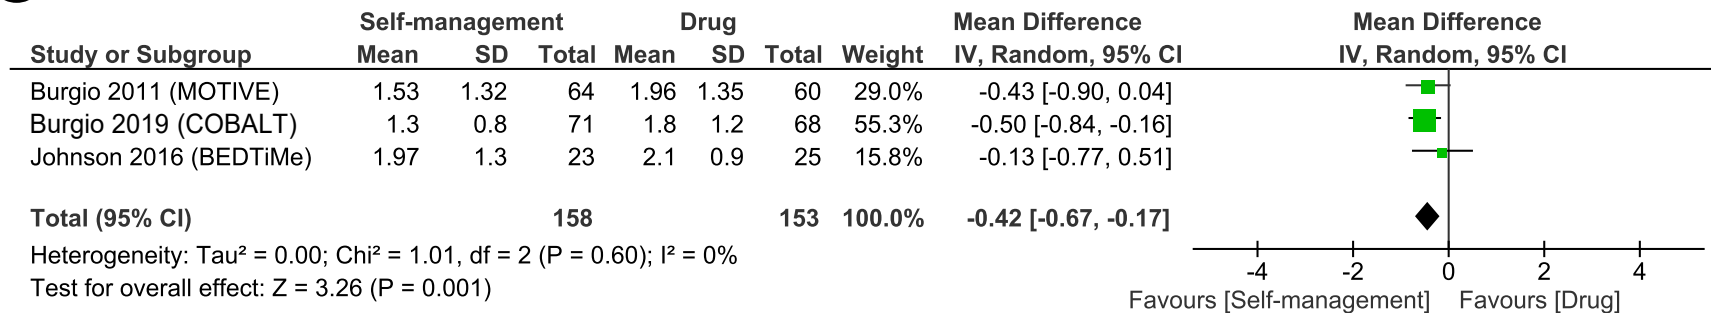

### C Combined self-management intervention and drug interventions versus drug intervention alone, nocturia episodes at 6-12 weeks

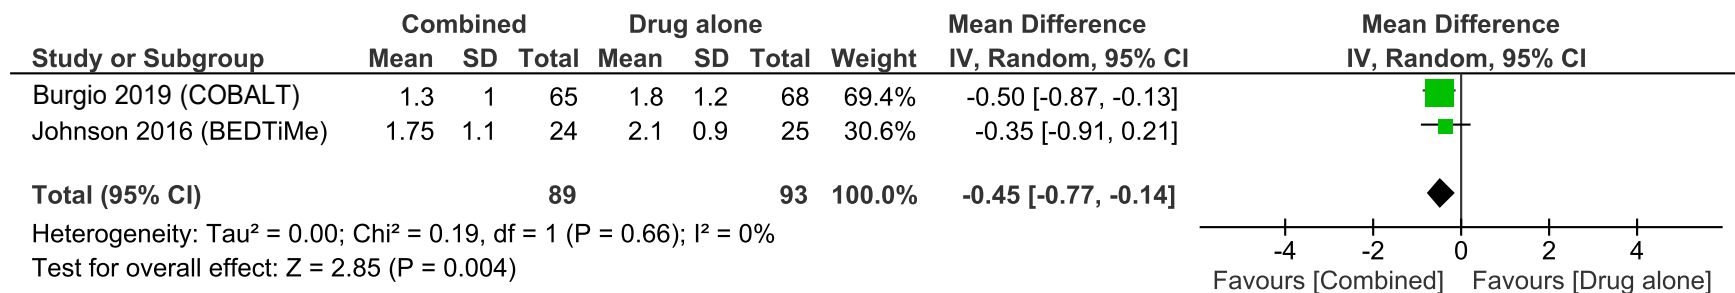

**Supplemental Figure 3.** Forest plot of symptoms impact score (BPH Impact Index, BPH-QoL score) in self-management intervention group versus usual/standard care at 6 months

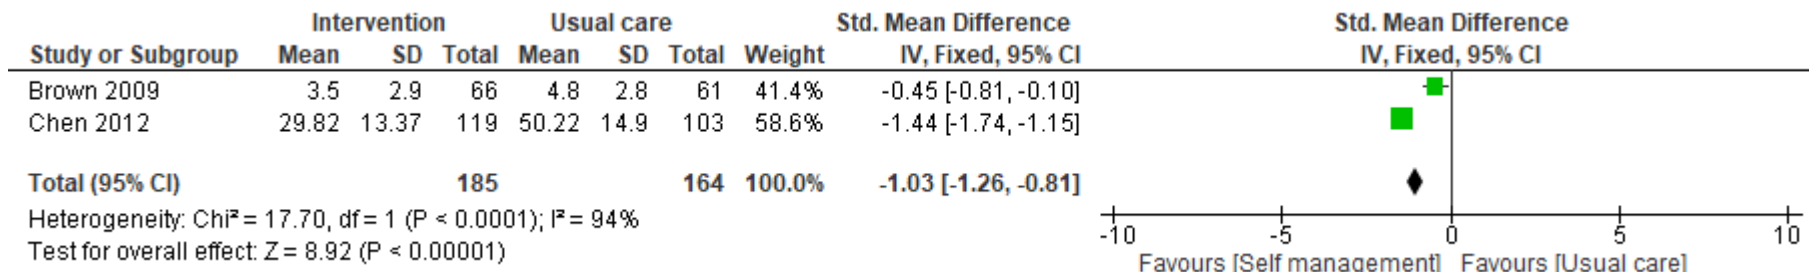

**Supplemental Figure 4.** Forest plot of 'How bothersome were side effects?' (i.e. any side effects compared to no side effects) in self-management intervention group versus drug intervention at 6-8 weeks.

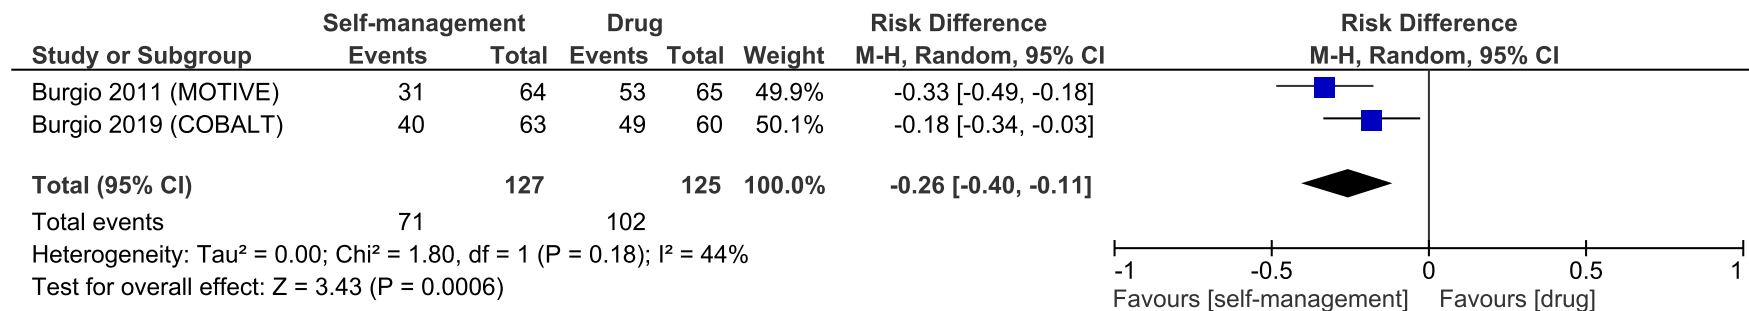

Supplement: Albarqouni_Supp_App_Tables_Figures.pdf [file Albarqouni_Supp_App_Tables_Figures.pdf]
